# Supplementary figures and images for: Improving the energy density of Na3V2(PO4)3-based positive electrodes through V/Al substitution
Source: Royal Society of Chemistry journal article supplement (doi:10.1039/c5ta03528g), 2015-01-01

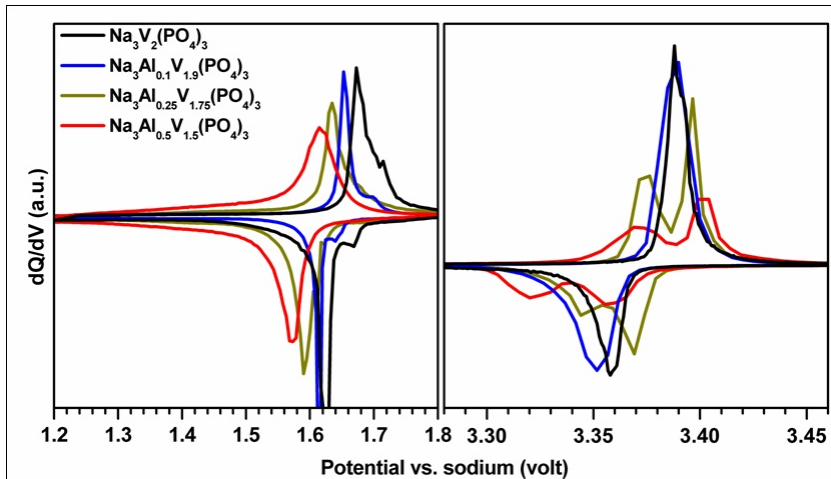

Supplement: c5ta03528g1.pdf [file c5ta03528g1.pdf]
